# Supplementary material for: Development of the Hypertension Index Model in General Adult Using the Korea National Health and Nutritional Examination Survey and the Korean Genome and Epidemiology Study
Source: MDPI journal article supplement (doi:10.3390/jpm11100968), 2021-09-28
Supplement: s1 [file s1]

*Supplementary Materials*

# **Development of the Hypertension Index Model in General Adult Using the Korea National Health and Nutritional Examination Survey and the Korean Genome and Epidemiology Study**

**Myung Jae Seo <sup>1</sup>, Sung Gyun Ahn <sup>2</sup>, Yong-Jae Lee <sup>3</sup> and Jong Koo Kim <sup>1,\*</sup>**

<sup>1</sup> Department of Family Medicine, Yonsei University Wonju College of Medicine, Wonju 26426, Republic of Korea; smjae@yonsei.ac.kr (M.J.S.)

<sup>2</sup> Division of Cardiology, Department of Internal Medicine, Yonsei University Wonju College of Medicine, Wonju 26426, Republic of Korea; sgahn@yonsei.ac.kr

<sup>3</sup> Department of Family Medicine, Yonsei University College of Medicine, Seoul 06273, Republic of Korea; ukyjhome@yuhs.ac

\* Correspondence: kimjk214@yonsei.ac.kr; Tel.: +82-33-741-1416

**Table S1. References in the literature-based search for variables.**

| Variables                                                                                     | Journal                                                                                          | Author         | Year of publication |
|-----------------------------------------------------------------------------------------------|--------------------------------------------------------------------------------------------------|----------------|---------------------|
| Age, <i>years</i>                                                                             | Hypertension and aging [1]                                                                       | Buford TW      | 2016                |
| Sex, <i>n</i>                                                                                 | Gender Differences in Epidemiology, Pathophysiology, and Treatment of Hypertension [2]           | Di Giosia P.   | 2018                |
|                                                                                               | Prevalence of hypertension in China [3]                                                          | Gao Y          | 2013                |
| Ethnicity, <i>n</i>                                                                           | Trends in prevalence, awareness, treatment, and control of hypertension in the United States [4] | Hajjar I       | 2003                |
| Education status, <i>n</i><br>Elementary school<br>Middle school<br>High school<br>University | Education, literacy, and health: Mediating effects on hypertension knowledge and control [5]     | Pandit A.U.    | 2009                |
|                                                                                               | Socioeconomic status and hypertension [6]                                                        | Leng B         | 2015                |
|                                                                                               |                                                                                                  |                |                     |
|                                                                                               |                                                                                                  |                |                     |
| Income status, <i>n</i><br>1st quartile<br>2nd quartile<br>3rd quartile<br>4th quartile       | Socioeconomic status and hypertension [6]                                                        | Leng B         | 2015                |
| Diabetes mellitus, <i>n</i>                                                                   | Hypertension and diabetes mellitus : coprediction and time trajectories [7]                      | Tsimihodimos V | 2018                |
| Dyslipidemia, <i>n</i>                                                                        | Dyslipidemia and the Risk of Developing Hypertension in a Working-Age Male Population [8]        | Otsuka T       | 2016                |
| Cancer, <i>n</i>                                                                              | Hypertension and breast cancer risk [9]                                                          | Han H          | 2017                |
|                                                                                               | Hypertension and risk of prostate cancer [10]                                                    | Liang Z        | 2016                |
|                                                                                               | Blood pressure and kidney cancer risk [11]                                                       | Hidayat K      | 2017                |
| Alzheimer disease, <i>n</i>                                                                   | Association between blood pressure and Alzheimer disease [12]                                    | Gabin, J.M.    | 2017                |
| Parkinson disease, <i>n</i>                                                                   | Association of blood pressure and hypertension with the risk of Parkinson disease [13]           | Qiu C          | 2011                |
| Non-alcoholic fatty liver disease, <i>n</i>                                                   | Hypertension and Nonalcoholic Fatty Liver Disease Proven by Transient Elastography [14]          | Wang Y         | 2016                |
| Smoking, <i>pack-years</i>                                                                    | Association between smoking and blood pressure [15]                                              | Primatesta P   | 2001                |
| Alcohol consumption, <i>g/week</i>                                                            | Effects of alcohol reduction on blood pressure [16]                                              | Xin X          | 2001                |
|                                                                                               | Alcohol consumption and risk for hypertension in middle-aged Japanese men [17]                   | Nakanishi N.   | 2001                |
| Exercise, <i>n</i>                                                                            | Progressive resistance exercise and resting blood pressure [18]                                  | Kelley GA      | 2000                |

|                                                                                                     |                                                                                                                                                                                                                                               |                                          |                          |
|-----------------------------------------------------------------------------------------------------|-----------------------------------------------------------------------------------------------------------------------------------------------------------------------------------------------------------------------------------------------|------------------------------------------|--------------------------|
|                                                                                                     | Effect of aerobic exercise on blood pressure [19]                                                                                                                                                                                             | Whelton SP                               | 2002                     |
| Diet<br>Total energy intake, <i>kcal</i><br>Sodium intake, <i>mg</i><br>Potassium intake, <i>mg</i> | Effects on blood pressure of reduced dietary sodium and the Dietary Approaches to Stop Hypertension (DASH) diet [20]<br>Effects of diet and sodium intake on blood pressure [21]<br>Dietary approaches to prevent and treat hypertension [22] | Sacks FM<br><br>Vollmer WM<br>Appel L.J. | 2001<br><br>2001<br>2006 |
| Sleep duration, <i>hours</i>                                                                        | Short sleep duration is associated with hypertension risk among adults [23]                                                                                                                                                                   | Wang Q                                   | 2012                     |
| Menopause, <i>n</i>                                                                                 | The influence of menopause on blood pressure [24]<br>Menopause-related blood pressure increase and its relationship to age and body mass index [25]                                                                                           | Staessen J<br><br>Zanchetti A            | 1989<br><br>2005         |
| Oral contraceptive, <i>n</i>                                                                        | Prospective study of oral contraceptives and hypertension among women in the United States [26]                                                                                                                                               | Chasan-Taber L.                          | 1996                     |
| Body mass index, <i>kg/m<sup>2</sup></i>                                                            | Influence of weight reduction on blood pressure [27]<br>Long-term effects of weight loss and dietary sodium reduction on incidence of hypertension [28]                                                                                       | Neter JE<br><br>He J                     | 2003<br><br>2000         |
| Waist circumference, <i>cm</i>                                                                      | The relationship of waist circumference to blood pressure [29]                                                                                                                                                                                | Siani A                                  | 2002                     |
| Systolic blood pressure, <i>mmHg</i>                                                                | Assessment of frequency of progression to hypertension in non-hypertensive participants in the Framingham Heart Study [30]                                                                                                                    | Vasan RS                                 | 2001                     |
| Diastolic blood pressure, <i>mmHg</i>                                                               | Assessment of frequency of progression to hypertension in non-hypertensive participants in the Framingham Heart Study [30]<br>High-normal blood pressure progression to hypertension in the Framingham Heart Study [31]                       | Vasan RS<br><br>Leitschuh M              | 2001<br><br>1991         |
| White blood cell, <i>thousand/<math>\mu</math>L</i>                                                 | Relationship between white blood cell count and incident hypertension [32]                                                                                                                                                                    | Shankar A                                | 2004                     |
| Hemoglobin, <i>g/dL</i>                                                                             | Association of hematocrit with blood pressure and hypertension [33]                                                                                                                                                                           | EmamianM                                 | 2017                     |
| Fasting plasma glucose, <i>mg/dL</i>                                                                | The association between fasting plasma glucose and glycated hemoglobin in the prediabetes range and future development of hypertension [34]                                                                                                   | Geva M                                   | 2019                     |
| Total cholesterol, <i>mg/dL</i>                                                                     | A prospective study of plasma lipid levels and hypertension in women [35]                                                                                                                                                                     | Sesso HD                                 | 2005                     |

|                                                                                                                 |                                                                                                                                   |                     |              |
|-----------------------------------------------------------------------------------------------------------------|-----------------------------------------------------------------------------------------------------------------------------------|---------------------|--------------|
| Triglyceride, <i>mg/dL</i>                                                                                      | Triglycerides and triglycerides to high-density lipoprotein cholesterol ratio are strong predictors of incident hypertension [36] | Tohidi M.           | 2012         |
| Creatinine, <i>mg/dL</i>                                                                                        | A prospective study of blood pressure and serum creatinine [37]                                                                   | Perneger TV         | 1993         |
| Liver enzyme, <i>IU/L</i><br>Aspartate aminotransferase<br>Alanine aminotransferase<br>Gammaglutamyl trasferase | Gamma-glutamyltransferase is a predictor of incident diabetes and hypertension [38]                                               | Lee DH              | 2003         |
| C-reactive protein, <i>mg/dL</i>                                                                                | C-reactive protein and the risk of developing hypertension [39]<br>Multiple biomarkers and the risk of incident hypertension [40] | Sesso HD<br>Wang TJ | 2003<br>2007 |
| Interleukin-6, <i>ng/mL</i>                                                                                     | Inflammation and hypertension: the interplay of interleukin-6, dietary sodium and the renin-angiotensin system in humans [41]     | Chamathi B          | 2011         |
| Aldosterone, <i>ng/dL</i>                                                                                       | Serum aldosterone and the incidence of hypertension in nonhypertensive persons [42]                                               | Vasan RS            | 2004         |
| Follicle-stimulating hormone, <i>IU/L</i>                                                                       | Follicle-stimulating hormone, its association with cardiometabolic risk factors [43]                                              | Wang N              | 2017         |
| Estrogen, <i>pg/mL</i>                                                                                          | Serum estrogen metabolites and systolic blood pressure [44]                                                                       | Masi CM             | 2009         |
| Testosterone, <i>ng/dL</i>                                                                                      | Serum Testosterone Levels and Arterial Blood Pressure [45]                                                                        | Fogari R            | 2005         |
| Forced vital capacity, <i>L</i>                                                                                 | Rate of decline of forced vital capacity predicts future arterial hypertension [46]                                               | Jacobs D.R          | 2012         |
| Forced expiratory volume during 1 s, <i>L</i>                                                                   | Blood pressure increase is inversely related to lung function [47]                                                                | Engstrom G          | 2001         |

**Table S2. General characteristics of internal validation dataset (KNHANES 2016–18).**

|                             | Internal validation dataset (KNHANES 2016–18) |                  |                 |                      |                  |                 |
|-----------------------------|-----------------------------------------------|------------------|-----------------|----------------------|------------------|-----------------|
|                             | n = 10,333                                    |                  |                 |                      |                  |                 |
|                             | Men                                           |                  |                 | Women                |                  |                 |
|                             | Non-hypertensio<br>n                          | Hypertensio<br>n | <i>P</i> -value | Non-hypertensio<br>n | Hypertensio<br>n | <i>P</i> -value |
|                             | n = 2,245                                     | n = 2,075        |                 | n = 3,576            | n = 2,437        |                 |
| Age, years                  | 57.4 ± 0.23                                   | 63.5 ± 0.24      | <.001           | 55.1 ± 0.17          | 66.1 ± 0.21      | <.001           |
| Income, n                   |                                               |                  | .167            |                      |                  | .004            |
| 1st quartile                | 520 (23.2)                                    | 541 (26.1)       |                 | 810 (22.7)           | 620 (25.4)       |                 |
| 2nd quartile                | 568 (25.3)                                    | 496 (23.9)       |                 | 901 (25.2)           | 619 (25.4)       |                 |
| 3rd quartile                | 570 (25.4)                                    | 514 (24.8)       |                 | 885 (24.7)           | 624 (25.6)       |                 |
| 4th quartile                | 587 (26.1)                                    | 524 (25.3)       |                 | 980 (27.4)           | 574 (23.6)       |                 |
| Education, n                |                                               |                  | <.001           |                      |                  | <.001           |
| Elementary school           | 376 (16.7)                                    | 539 (26)         |                 | 731 (20.4)           | 1343 (55.1)      |                 |
| Middle school               | 261 (11.6)                                    | 346 (16.7)       |                 | 448 (12.5)           | 335 (13.7)       |                 |
| High school                 | 698 (31.1)                                    | 626 (30.2)       |                 | 1269 (35.5)          | 506 (20.8)       |                 |
| University                  | 910 (40.5)                                    | 564 (27.2)       |                 | 1128 (31.5)          | 253 (10.4)       |                 |
| Diabetes mellitus, n        | 317 (14.1)                                    | 591 (28.5)       | <.001           | 260 (7.3)            | 626 (25.7)       | <.001           |
| Dyslipidemia, n             | 161 (7.2)                                     | 498 (24)         | <.001           | 386 (10.8)           | 812 (33.3)       | <.001           |
| Cancer, n                   | 83 (3.7)                                      | 92 (4.4)         | .25             | 211 (5.9)            | 170 (7)          | .104            |
| Smoking, pack-years         | 17.9 ± 0.39                                   | 21.4 ± 0.47      | <.001           | 0.6 ± 0.06           | 0.9 ± 0.1        | .045            |
| Alcohol consumption, g/week | 95.3 ± 3.15                                   | 129.7 ± 3.87     | <.001           | 19.9 ± 0.96          | 18.2 ± 1.31      | .291            |
| Total energy intake, kcal   | 2254.4 ± 18.59                                | 2118.3 ± 19.14   | <.001           | 1651.5 ± 10.93       | 1497.1 ± 12.65   | <.001           |
| BMI, kg/m2                  | 23.8 ± 0.06                                   | 24.9 ± 0.07      | <.001           | 23.3 ± 0.05          | 25.1 ± 0.07      | <.001           |
| Waist circumference, cm     | 85.1 ± 0.17                                   | 88.8 ± 0.19      | <.001           | 78.5 ± 0.14          | 84.5 ± 0.19      | <.001           |
| Systolic BP, mmHg           | 116 ± 0.23                                    | 131.1 ± 0.36     | <.001           | 112.8 ± 0.2          | 134.7 ± 0.36     | <.001           |
| Diastolic BP, mmHg          | 75.5 ± 0.17                                   | 79.5 ± 0.28      | <.001           | 72.7 ± 0.13          | 77.9 ± 0.23      | <.001           |
| FPG, mg/dL                  | 104.5 ± 0.55                                  | 112.6 ± 0.67     | <.001           | 97.5 ± 0.31          | 108.3 ± 0.59     | <.001           |
| Creatinine, mg/dL           | 0.9 ± 0.0031                                  | 1 ± 0.0098       | <.001           | 0.69 ± 0.0033        | 0.71 ± 0.0061    | <.001           |
| Total cholesterol, mg/dL    | 194.3 ± 0.79                                  | 182.5 ± 0.87     | <.001           | 201.6 ± 0.63         | 190.9 ± 0.82     | <.001           |
| Triglyceride, mg/dL         | 157.1 ±                                       | 167.8 ±          | .008            | 115.6 ±              | 138.9 ±          | <.001           |



**Table S3. Baseline characteristics of external validation dataset (KoGES).**

|                                | External validation dataset (KoGES)<br>n =4,633 |                               |         |                      |                               |         |
|--------------------------------|-------------------------------------------------|-------------------------------|---------|----------------------|-------------------------------|---------|
|                                | Men                                             |                               |         | Women                |                               |         |
|                                | Non-hypertensio<br>n                            | New-onset<br>hypertensio<br>n | P-value | Non-hypertensio<br>n | New-onset<br>hypertensio<br>n | P-value |
|                                | n = 1,316                                       | n = 847                       |         | n = 1,615            | n = 855                       |         |
| Age, years                     | 49.4 ±<br>0.22                                  | 51.4 ±<br>0.3                 | <.001   | 48.4 ±<br>0.19       | 53.5 ±<br>0.3                 | <.001   |
| Income, n                      |                                                 |                               | <.001   |                      |                               | <.001   |
| 1st quartile                   | 127<br>(9.7)                                    | 106<br>(12.5)                 |         | 199<br>(12.3)        | 224<br>(26.2)                 |         |
| 2nd quartile                   | 304<br>(23.1)                                   | 256<br>(30.2)                 |         | 477<br>(29.5)        | 298<br>(34.9)                 |         |
| 3rd quartile                   | 540<br>(41)                                     | 289<br>(34.1)                 |         | 617<br>(38.2)        | 227<br>(26.5)                 |         |
| 4th quartile                   | 345<br>(26.2)                                   | 196<br>(23.1)                 |         | 322<br>(19.9)        | 106<br>(12.4)                 |         |
| Education, n                   |                                                 |                               | <.001   |                      |                               | <.001   |
| Elementary school              | 185<br>(14.1)                                   | 173<br>(20.4)                 |         | 452<br>(28)          | 411<br>(48.1)                 |         |
| Middle school                  | 233<br>(17.7)                                   | 203<br>(24)                   |         | 413<br>(25.6)        | 204<br>(23.9)                 |         |
| High school                    | 544<br>(41.3)                                   | 309<br>(36.5)                 |         | 595<br>(36.8)        | 196<br>(22.9)                 |         |
| University                     | 354<br>(26.9)                                   | 162<br>(19.1)                 |         | 155<br>(9.6)         | 44<br>(5.1)                   |         |
| Diabetes mellitus, n           | 81<br>(6.2)                                     | 59<br>(7)                     | .51     | 48<br>(3)            | 26<br>(3)                     | .999    |
| Dyslipidemia, n                | 39<br>(3)                                       | 20<br>(2.4)                   | .481    | 27<br>(1.7)          | 11<br>(1.3)                   | .57     |
| Cancer, n                      | 4<br>(0.3)                                      | 0<br>(0)                      | -       | 40<br>(2.5)          | 21<br>(2.5)                   | .999    |
| Smoking, pack-years            | 12.2 ±<br>0.45                                  | 13.3 ±<br>0.57                | .156    | 0.3 ±<br>0.06        | 0.3 ±<br>0.07                 | .996    |
| Alcohol consumption,<br>g/week | 113.5 ±<br>5.01                                 | 132.1 ±<br>6.48               | .024    | 9.6 ±<br>0.84        | 7.5 ±<br>1.07                 | .134    |
| Total energy intake, kcal      | 1990.3 ±<br>15.21                               | 2040.4 ±<br>24.24             | .08     | 1909.5 ±<br>17.28    | 1929.1 ±<br>26.86             | .539    |
| BMI, kg/m2                     | 23.7 ±<br>0.08                                  | 24.3 ±<br>0.1                 | <.001   | 24 ±<br>0.07         | 25.1 ±<br>0.11                | <.001   |
| Waist circumference, cm        | 81.4 ±<br>0.2                                   | 83.7 ±<br>0.25                | <.001   | 77.7 ±<br>0.22       | 82.6 ±<br>0.32                | <.001   |
| Systolic BP, mmHg              | 111 ±<br>0.29                                   | 117.9 ±<br>0.34               | <.001   | 107.1 ±<br>0.28      | 118.5 ±<br>0.36               | <.001   |
| Diastolic BP, mmHg             | 74.7 ±<br>0.2                                   | 78.6 ±<br>0.23                | <.001   | 70.9 ±<br>0.2        | 77.3 ±<br>0.23                | <.001   |
| FPG, mg/dL                     | 89 ±<br>0.59                                    | 89 ±<br>0.71                  | .987    | 82.7 ±<br>0.43       | 83.8 ±<br>0.56                | .139    |
| Creatinine, mg/dL              | 1 ±<br>0.004                                    | 0.9 ±<br>0.006                | .261    | 0.7 ±<br>0.003       | 0.7 ±<br>0.004                | .415    |
| Total cholesterol, mg/dL       | 192.1 ±<br>0.94                                 | 190.4 ±<br>1.22               | .262    | 186.2 ±<br>0.84      | 189.5 ±<br>1.16               | .021    |





**Table S4. Baseline characteristics of external validation dataset (KoGES) by quintiles of hypertension probabilities in Korean men.**

|                             | Quantiles of hypertension probabilities |                  |                   |                  |                   |             |
|-----------------------------|-----------------------------------------|------------------|-------------------|------------------|-------------------|-------------|
|                             | Q1                                      | Q2               | Q3                | Q4               | Q5                | P for Trend |
|                             | n = 433                                 | n = 432          | n = 433           | n = 432          | n = 433           |             |
| Range of probabilities      | 0.0006 – 0.0347                         | 0.0347 – 0.0882  | 0.0882 – 0.1904   | 0.1907 – 0.3619  | 0.3625 – 0.9611   |             |
| Age, years                  | 46.2 ± 0.3                              | 47.2 ± 0.31      | 49.7 ± 0.38       | 52.2 ± 0.4       | 55.8 ± 0.42       | <.001       |
| Income, n                   |                                         |                  |                   |                  |                   | <.001       |
| 1st quartile                | 18 (4.2)                                | 28 (6.5)         | 47 (10.9)         | 52 (12)          | 88 (20.3)         |             |
| 2nd quartile                | 70 (16.2)                               | 112 (25.9)       | 106 (24.5)        | 123 (28.5)       | 149 (34.4)        |             |
| 3rd quartile                | 223 (51.5)                              | 159 (36.8)       | 172 (39.7)        | 158 (36.6)       | 117 (27)          |             |
| 4th quartile                | 122 (28.2)                              | 133 (30.8)       | 108 (24.9)        | 99 (22.9)        | 79 (18.2)         |             |
| Education, n                |                                         |                  |                   |                  |                   | <.001       |
| Elementary school           | 38 (8.8)                                | 46 (10.6)        | 65 (15)           | 77 (17.8)        | 132 (30.5)        |             |
| Middle school               | 67 (15.5)                               | 85 (19.7)        | 87 (20.1)         | 96 (22.2)        | 101 (23.3)        |             |
| High school                 | 192 (44.3)                              | 176 (40.7)       | 186 (43)          | 168 (38.9)       | 131 (30.3)        |             |
| University                  | 136 (31.4)                              | 125 (28.9)       | 95 (21.9)         | 91 (21.1)        | 69 (15.9)         |             |
| Diabetes mellitus, n        | 18 (4.2)                                | 23 (5.3)         | 30 (6.9)          | 23 (5.3)         | 46 (10.6)         | .001        |
| Dyslipidemia, n             | 4 (0.9)                                 | 6 (1.4)          | 8 (1.8)           | 16 (3.7)         | 25 (5.8)          | <.001       |
| Cancer, n                   | 1 (0.2)                                 | 432 (100)        | 2 (0.5)           | 1 (0.2)          | 0 (0)             | -           |
| Smoking, pack-years         | 12.9 ± 0.69                             | 12.4 ± 0.72      | 12.3 ± 0.81       | 12.8 ± 0.87      | 12.8 ± 0.85       | .826        |
| Alcohol consumption, g/week | 86.4 ± 7.16                             | 103.6 ± 8.1      | 129.2 ± 9.82      | 140.6 ± 10.1     | 144.1 ± 8.57      | <.001       |
| Total energy intake, kcal   | 2028.3 ± 27.88                          | 2053.2 ± 28.44   | 1981.2 ± 28.66    | 2014.3 ± 33.36   | 1973 ± 29.58      | .114        |
| BMI, kg/m2                  | 22.9 ± 0.13                             | 23.8 ± 0.13      | 23.8 ± 0.13       | 24.3 ± 0.13      | 24.7 ± 0.15       | <.001       |
| Waist circumference, cm     | 79 ± 0.32                               | 81.2 ± 0.33      | 82 ± 0.34         | 83.8 ± 0.33      | 85.3 ± 0.37       | <.001       |
| Systolic BP, mmHg           | 100 ± 0.34                              | 109.4 ± 0.26     | 113.9 ± 0.28      | 118.7 ± 0.28     | 126.5 ± 0.3       | <.001       |
| Diastolic BP, mmHg          | 67.9 ± 0.3                              | 73.9 ± 0.25      | 77.5 ± 0.26       | 79.8 ± 0.25      | 82.3 ± 0.23       | <.001       |
| FPG, mg/dL                  | 86.2 ± 1.03                             | 88.1 ± 0.88      | 90.2 ± 1.11       | 89 ± 0.94        | 91.4 ± 1.09       | .001        |
| Creatinine, mg/dL           | 0.94365 ± 0.00731                       | 0.9338 ± 0.00784 | 0.95704 ± 0.00758 | 0.96343 ± 0.0081 | 0.96628 ± 0.00848 | .005        |
| Total cholesterol, mg/dL    | 193.9 ± 1.64                            | 192.7 ± 1.67     | 192.2 ± 1.69      | 192.5 ± 1.6      | 185.8 ± 1.72      | <.001       |
| Triglyceride, mg/dL         | 153.2 ± 5.22                            | 153.3 ± 4.72     | 159.3 ± 4.41      | 178 ± 5.1        | 188.7 ± 5.06      | <.001       |
| WBC, thousand/μL            | 6.6 ± 0.09                              | 6.6 ± 0.09       | 6.7 ± 0.09        | 6.8 ± 0.09       | 7 ± 0.09          | <.001       |
| Hb, g/dL                    | 14.8 ± 0.05                             | 14.7 ± 0.05      | 14.7 ± 0.05       | 14.7 ± 0.05      | 14.7 ± 0.05       | .14         |

Continuous variables are presented as median ± standard error, and categorical variables are presented as numbers (percentage, %).

Abbreviations: KoGES, Korean Genome and Epidemiology Study; Q, quintile; BMI, body mass index; BP, blood pressure; FPG, fasting plasma glucose; WBC, white blood cells; Hb, hemoglobin.



Supplementary Figure S1. Predictors for Korean men selected by NRI method.

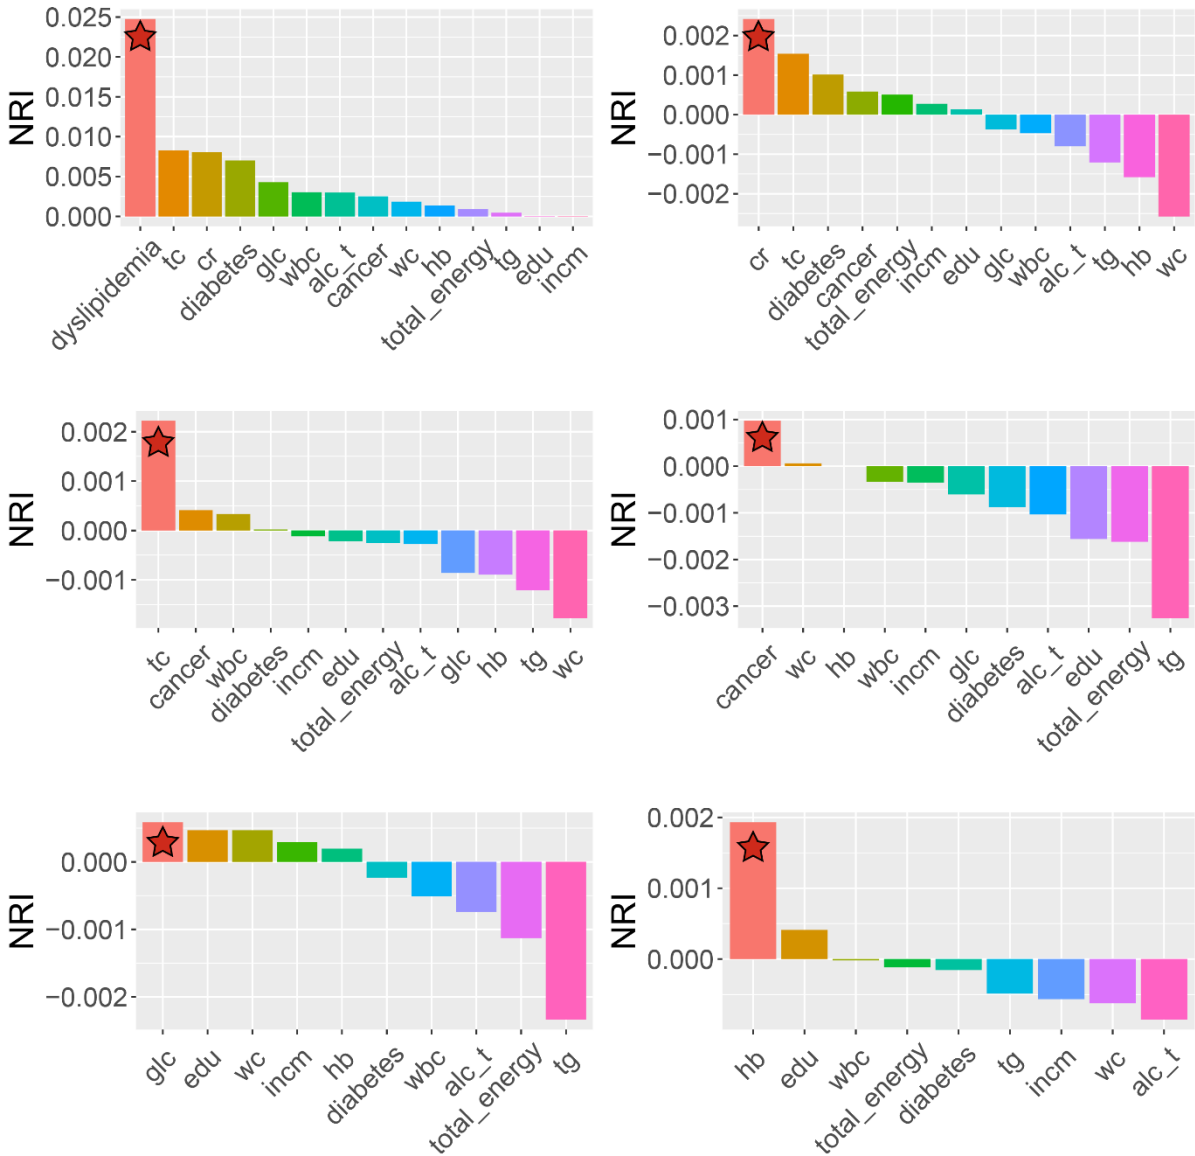

Supplementary Figure S1. Predictors for Korean men selected by NRI method (Continued).

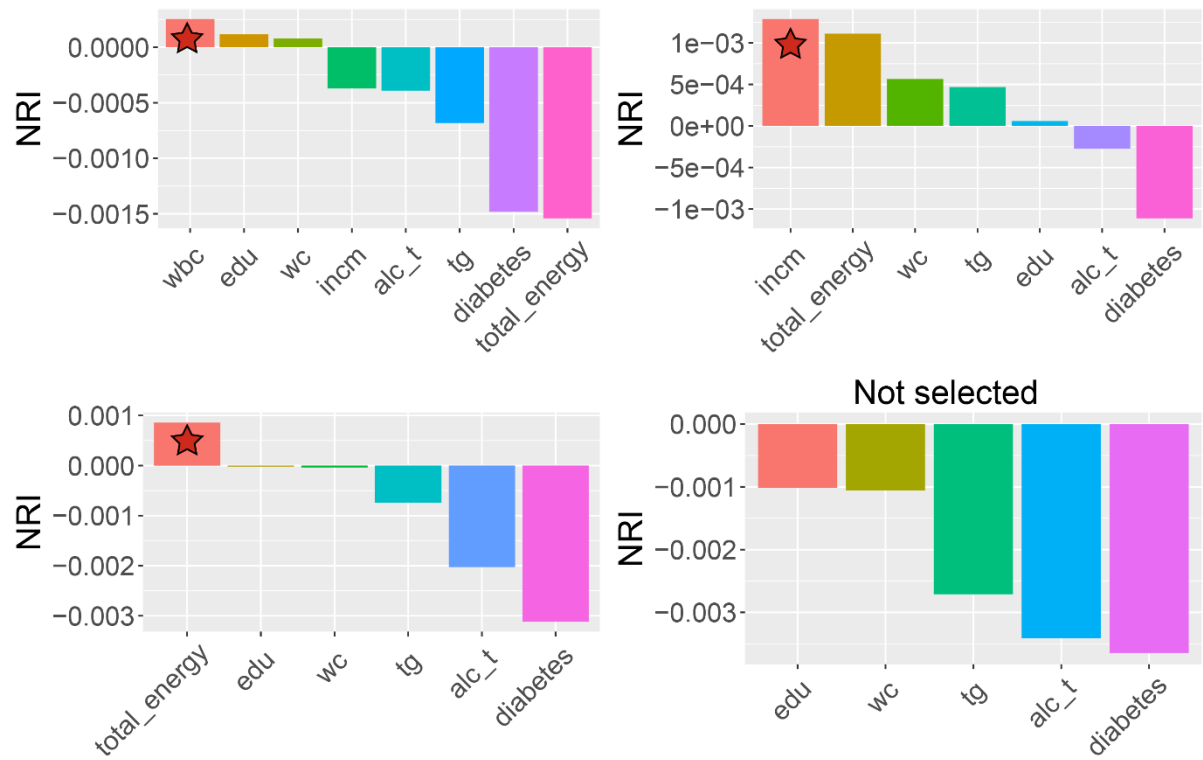

Supplementary Figure S2. Predictors for Korean women selected by NRI method.

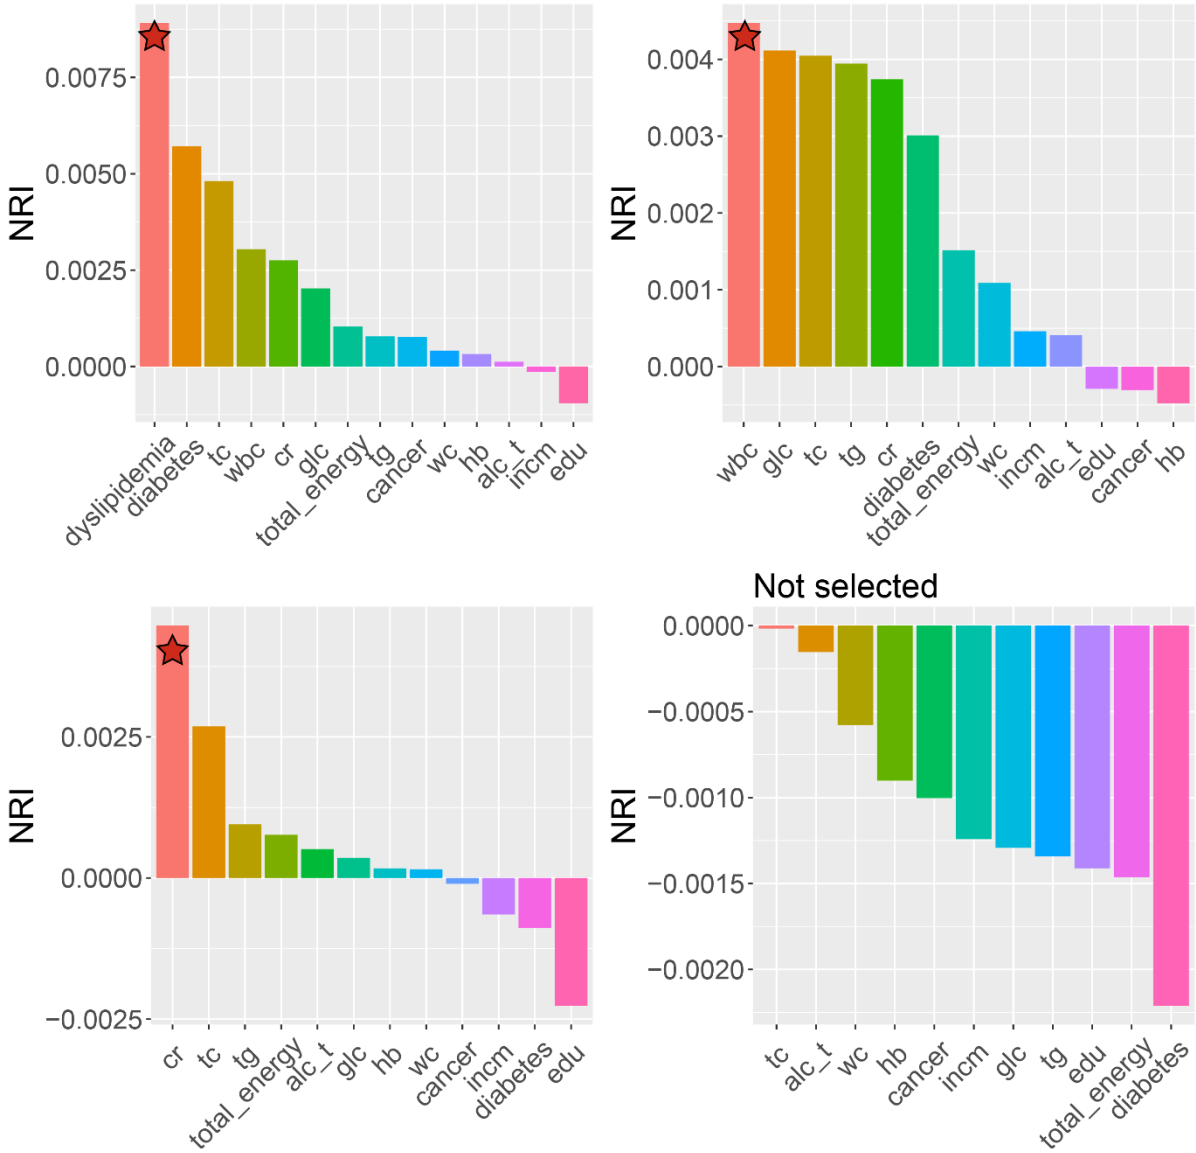

Supplementary Figure S3. CART analysis flowchart

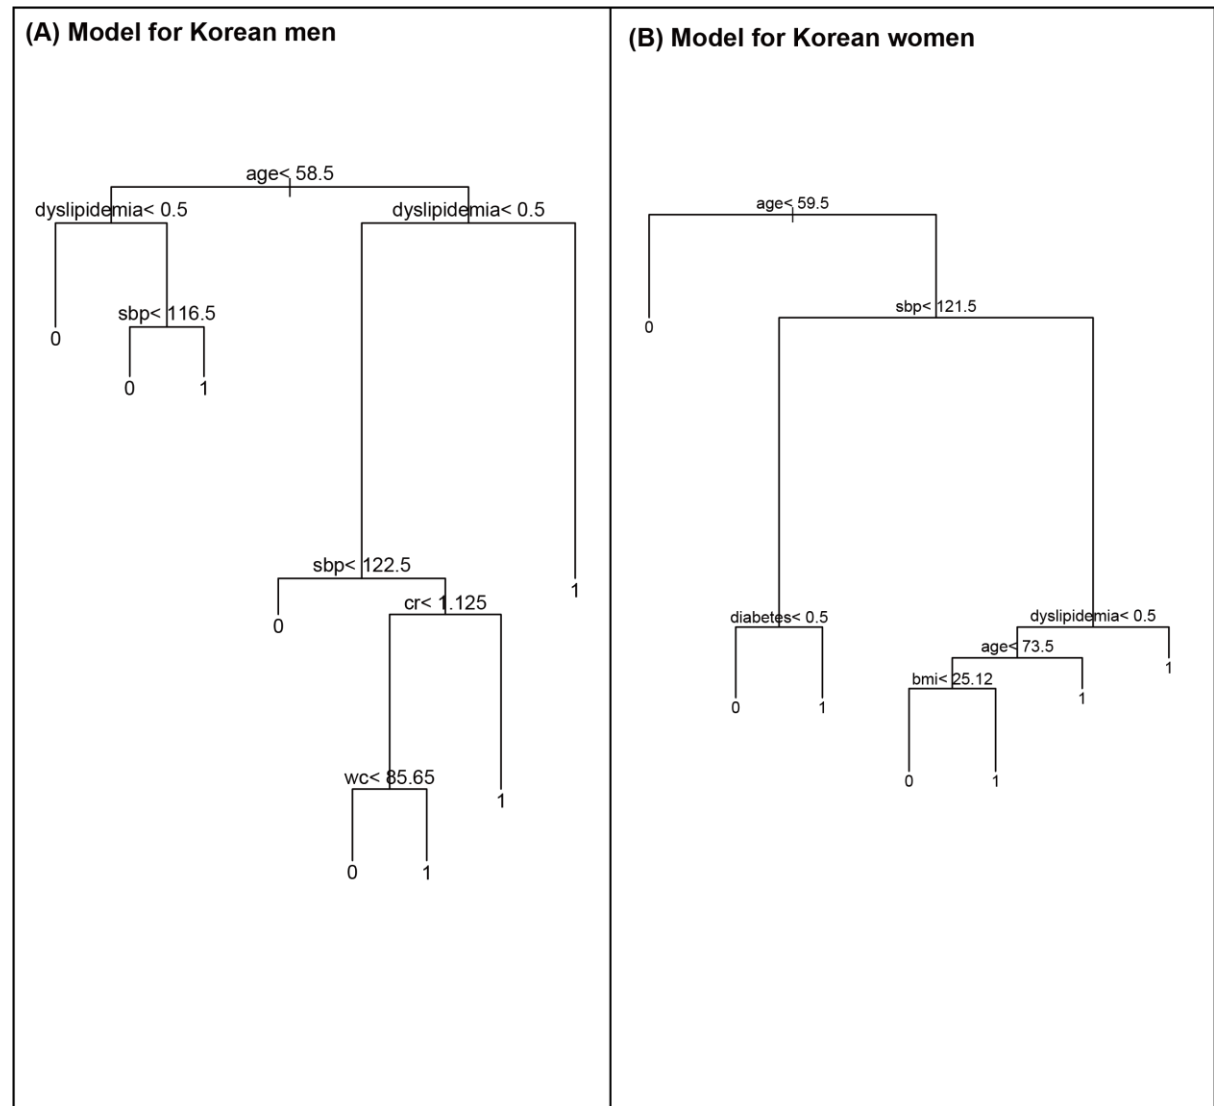

**Supplementary Figure S4. Variance importance of the sex-specific hypertension classification model measured by CART method. (A) Men (B) Women.**

(A)

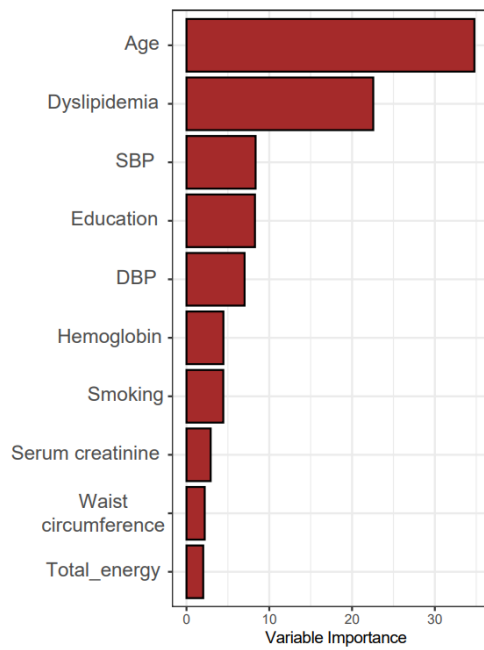

(B)

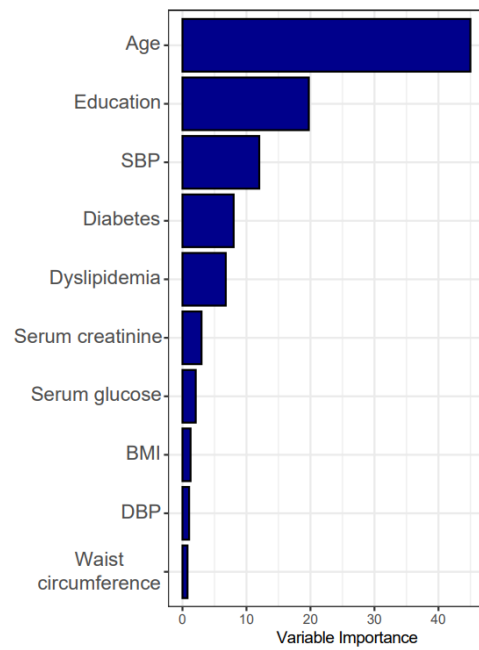

## References

1. Buford, T.W. Hypertension and aging. *Ageing Res. Rev.* **2016**, *26*, 96-111, doi:10.1016/j.arr.2016.01.007.
2. Di Giosia, P.; Giorgini, P.; Stamerra, C.A.; Petrarca, M.; Ferri, C.; Sahebkar, A. Gender differences in epidemiology, pathophysiology, and treatment of hypertension. *Curr. Atheroscler. Rep.* **2018**, *20*, 13, doi:10.1007/s11883-018-0716-z.
3. Gao, Y.; Chen, G.; Tian, H.; Lin, L.; Lu, J.; Weng, J.; Jia, W.; Ji, L.; Xiao, J.; Zhou, Z.; et al. Prevalence of hypertension in china: a cross-sectional study. *PLoS One* **2013**, *8*, e65938, doi:10.1371/journal.pone.0065938.
4. Hajjar, I.; Kotchen, T.A. Trends in prevalence, awareness, treatment, and control of hypertension in the United States, 1988-2000. *JAMA* **2003**, *290*, 199-206, doi:10.1001/jama.290.2.199.
5. Pandit, A.U.; Tang, J.W.; Bailey, S.C.; Davis, T.C.; Bocchini, M.V.; Persell, S.D.; Federman, A.D.; Wolf, M.S. Education, literacy, and health: Mediating effects on hypertension knowledge and control. *Patient Educ. Couns.* **2009**, *75*, 381-385, doi:10.1016/j.pec.2009.04.006.
6. Leng, B.; Jin, Y.; Li, G.; Chen, L.; Jin, N. Socioeconomic status and hypertension: a meta-analysis. *J. Hypertens.* **2015**, *33*, 221-229, doi:10.1097/hjh.0000000000000428.
7. Tsimihodimos, V.; Gonzalez-Villalpando, C.; Meigs, J.B.; Ferrannini, E. Hypertension and Diabetes Mellitus: Coprediction and Time Trajectories. *Hypertension* **2018**, *71*, 422-428, doi:10.1161/hypertensionaha.117.10546.
8. Otsuka, T.; Takada, H.; Nishiyama, Y.; Kodani, E.; Saiki, Y.; Kato, K.; Kawada, T. Dyslipidemia and the risk of developing hypertension in a working-age male population. *J. Am. Heart Assoc.* **2016**, *5*, e003053, doi:10.1161/jaha.115.003053.
9. Han, H.; Guo, W.; Shi, W.; Yu, Y.; Zhang, Y.; Ye, X.; He, J. Hypertension and breast cancer risk: a systematic review and meta-analysis. *Sci. Rep.* **2017**, *7*, 44877, doi:10.1038/srep44877.
10. Liang, Z.; Xie, B.; Li, J.; Wang, X.; Wang, S.; Meng, S.; Ji, A.; Zhu, Y.; Xu, X.; Zheng, X.; et al. Hypertension and risk of prostate cancer: a systematic review and meta-analysis. *Sci. Rep.* **2016**, *6*, 31358, doi:10.1038/srep31358.
11. Hidayat, K.; Du, X.; Zou, S.Y.; Shi, B.M. Blood pressure and kidney cancer risk: meta-analysis of prospective studies. *J. Hypertens.* **2017**, *35*, 1333-1344, doi:10.1097/hjh.0000000000001286.
12. Gabin, J.M.; Tambs, K.; Saltvedt, I.; Sund, E.; Holmen, J. Association between blood pressure and Alzheimer disease measured up to 27 years prior to diagnosis: the HUNT Study. *Alzheimers Res. Ther.* **2017**, *9*, 37, doi:10.1186/s13195-017-0262-x.



13. Qiu, C.; Hu, G.; Kivipelto, M.; Laatikainen, T.; Antikainen, R.; Fratiglioni, L.; Jousilahti, P.; Tuomilehto, J. Association of blood pressure and hypertension with the risk of Parkinson disease: the National FINRISK Study. *Hypertension* **2011**, *57*, 1094-1100, doi:10.1161/hypertensionaha.111.171249.
14. Wang, Y.; Zeng, Y.; Lin, C.; Chen, Z. Hypertension and non-alcoholic fatty liver disease proven by transient elastography. *Hepatol. Res.* **2016**, *46*, 1304-1310, doi:10.1111/hepr.12688.
15. Primatesta, P.; Falaschetti, E.; Gupta, S.; Marmot, M.G.; Poulter, N.R. Association between smoking and blood pressure: evidence from the health survey for England. *Hypertension* **2001**, *37*, 187-193, doi:10.1161/01.hyp.37.2.187.
16. Xin, X.; He, J.; Frontini, M.G.; Ogden, L.G.; Motsamai, O.I.; Whelton, P.K. Effects of alcohol reduction on blood pressure: a meta-analysis of randomized controlled trials. *Hypertension* **2001**, *38*, 1112-1117, doi:10.1161/hy1101.093424.
17. Nakanishi, N.; Yoshida, H.; Nakamura, K.; Suzuki, K.; Tatara, K. Alcohol consumption and risk for hypertension in middle-aged Japanese men. *J. Hypertens.* **2001**, *19*, 851-855, doi:10.1097/00004872-200105000-00003.
18. Kelley, G.A.; Kelley, K.S. Progressive resistance exercise and resting blood pressure : A meta-analysis of randomized controlled trials. *Hypertension* **2000**, *35*, 838-843, doi:10.1161/01.hyp.35.3.838.
19. Whelton, S.P.; Chin, A.; Xin, X.; He, J. Effect of aerobic exercise on blood pressure: a meta-analysis of randomized, controlled trials. *Ann. Intern. Med.* **2002**, *136*, 493-503, doi:10.7326/0003-4819-136-7-200204020-00006.
20. Sacks, F.M.; Svetkey, L.P.; Vollmer, W.M.; Appel, L.J.; Bray, G.A.; Harsha, D.; Obarzanek, E.; Conlin, P.R.; Miller, E.R., 3rd; Simons-Morton, D.G.; et al. Effects on blood pressure of reduced dietary sodium and the Dietary Approaches to Stop Hypertension (DASH) diet. DASH-Sodium Collaborative Research Group. *N. Engl. J. Med.* **2001**, *344*, 3-10, doi:10.1056/nejm200101043440101.
21. Vollmer, W.M.; Sacks, F.M.; Ard, J.; Appel, L.J.; Bray, G.A.; Simons-Morton, D.G.; Conlin, P.R.; Svetkey, L.P.; Erlinger, T.P.; Moore, T.J.; et al. Effects of diet and sodium intake on blood pressure: subgroup analysis of the DASH-sodium trial. *Ann. Intern. Med.* **2001**, *135*, 1019-1028, doi:10.7326/0003-4819-135-12-200112180-00005.

22. Appel, L.J.; Brands, M.W.; Daniels, S.R.; Karanja, N.; Elmer, P.J.; Sacks, F.M. Dietary approaches to prevent and treat hypertension: a scientific statement from the American Heart Association. *Hypertension* **2006**, *47*, 296-308, doi:10.1161/01.Hyp.0000202568.01167.B6.
23. Wang, Q.; Xi, B.; Liu, M.; Zhang, Y.; Fu, M. Short sleep duration is associated with hypertension risk among adults: a systematic review and meta-analysis. *Hypertens. Res.* **2012**, *35*, 1012-1018, doi:10.1038/hr.2012.91.
24. Staessen, J.; Bulpitt, C.J.; Fagard, R.; Lijnen, P.; Amery, A. The influence of menopause on blood pressure. *J. Hum. Hypertens.* **1989**, *3*, 427-433.
25. Zanchetti, A.; Facchetti, R.; Cesana, G.C.; Modena, M.G.; Pirrelli, A.; Sega, R. Menopause-related blood pressure increase and its relationship to age and body mass index: the SIMONA epidemiological study. *J. Hypertens.* **2005**, *23*, 2269-2276, doi:10.1097/01.hjh.0000194118.35098.43.
26. Chasan-Taber, L.; Willett, W.C.; Manson, J.E.; Spiegelman, D.; Hunter, D.J.; Curhan, G.; Colditz, G.A.; Stampfer, M.J. Prospective study of oral contraceptives and hypertension among women in the United States. *Circulation* **1996**, *94*, 483-489, doi:10.1161/01.cir.94.3.483.
27. He, J.; Whelton, P.K.; Appel, L.J.; Charleston, J.; Klag, M.J. Long-term effects of weight loss and dietary sodium reduction on incidence of hypertension. *Hypertension* **2000**, *35*, 544-549, doi:10.1161/01.hyp.35.2.544.
28. Neter, J.E.; Stam, B.E.; Kok, F.J.; Grobbee, D.E.; Geleijnse, J.M. Influence of weight reduction on blood pressure: a meta-analysis of randomized controlled trials. *Hypertension* **2003**, *42*, 878-884, doi:10.1161/01.Hyp.0000094221.86888.Ae.
29. Siani, A.; Cappuccio, F.P.; Barba, G.; Trevisan, M.; Farinero, E.; Lacone, R.; Russo, O.; Russo, P.; Mancini, M.; Strazzullo, P. The relationship of waist circumference to blood pressure: the Olivetti Heart Study. *Am. J. Hypertens.* **2002**, *15*, 780-786, doi:10.1016/s0895-7061(02)02976-x.
30. Vasan, R.S.; Larson, M.G.; Leip, E.P.; Kannel, W.B.; Levy, D. Assessment of frequency of progression to hypertension in non-hypertensive participants in the Framingham Heart Study: a cohort study. *Lancet* **2001**, *358*, 1682-1686, doi:10.1016/s0140-6736(01)06710-1.
31. Leitschuh, M.; Cupples, L.A.; Kannel, W.; Gagnon, D.; Chobanian, A. High-normal blood pressure progression to hypertension in the Framingham Heart Study. *Hypertension* **1991**, *17*, 22-27, doi:10.1161/01.hyp.17.1.22.

32. Shankar, A.; Klein, B.E.; Klein, R. Relationship between white blood cell count and incident hypertension. *Am. J. Hypertens.* **2004**, *17*, 233-239, doi:10.1016/j.amjhyper.2003.11.005.
33. Emamian, M.; Hasanian, S.M.; Tayefi, M.; Bijari, M.; Movahedian Far, F.; Shafiee, M.; Avan, A.; Heidari-Bakavoli, A.; Moohebat, M.; Ebrahimi, M.; et al. Association of hematocrit with blood pressure and hypertension. *J. Clin. Lab. Anal.* **2017**, *31*, e22124, doi:10.1002/jcla.22124.
34. Geva, M.; Shloma, G.; Berkovich, A.; Maor, E.; Leibowitz, A.; Tenenbaum, A.; Grossman, E. The association between fasting plasma glucose and glycated hemoglobin in the prediabetes range and future development of hypertension. *Cardiovasc. Diabetol.* **2019**, *18*, 53, doi:10.1186/s12933-019-0859-4.
35. Sesso, H.D.; Buring, J.E.; Chown, M.J.; Ridker, P.M.; Gaziano, J.M. A prospective study of plasma lipid levels and hypertension in women. *Arch. Intern. Med.* **2005**, *165*, 2420-2427, doi:10.1001/archinte.165.20.2420.
36. Tohidi, M.; Hatami, M.; Hadaegh, F.; Azizi, F. Triglycerides and triglycerides to high-density lipoprotein cholesterol ratio are strong predictors of incident hypertension in Middle Eastern women. *J. Hum. Hypertens.* **2012**, *26*, 525-532, doi:10.1038/jhh.2011.70.
37. Perneger, T.V.; Nieto, F.J.; Whelton, P.K.; Klag, M.J.; Comstock, G.W.; Szklo, M. A prospective study of blood pressure and serum creatinine. Results from the 'Clue' Study and the ARIC Study. *JAMA* **1993**, *269*, 488-493.
38. Lee, D.H.; Jacobs, D.R., Jr.; Gross, M.; Kiefe, C.I.; Roseman, J.; Lewis, C.E.; Steffes, M. Gamma-glutamyltransferase is a predictor of incident diabetes and hypertension: the Coronary Artery Risk Development in Young Adults (CARDIA) Study. *Clin. Chem.* **2003**, *49*, 1358-1366, doi:10.1373/49.8.1358.
39. Sesso, H.D.; Buring, J.E.; Rifai, N.; Blake, G.J.; Gaziano, J.M.; Ridker, P.M. C-reactive protein and the risk of developing hypertension. *JAMA* **2003**, *290*, 2945-2951, doi:10.1001/jama.290.22.2945.
40. Wang, T.J.; Gona, P.; Larson, M.G.; Levy, D.; Benjamin, E.J.; Tofler, G.H.; Jacques, P.F.; Meigs, J.B.; Rifai, N.; Selhub, J.; et al. Multiple biomarkers and the risk of incident hypertension. *Hypertension* **2007**, *49*, 432-438, doi:10.1161/01.HYP.0000256956.61872.aa.
41. Chamarthi, B.; Williams, G.H.; Ricchiuti, V.; Srikumar, N.; Hopkins, P.N.; Luther, J.M.; Jeunemaitre, X.; Thomas, A. Inflammation and hypertension: the interplay of interleukin-6, dietary sodium, and the renin-angiotensin system in humans. *Am. J. Hypertens.* **2011**, *24*, 1143-1148, doi:10.1038/ajh.2011.113.

42. Vasan, R.S.; Evans, J.C.; Larson, M.G.; Wilson, P.W.; Meigs, J.B.; Rifai, N.; Benjamin, E.J.; Levy, D. Serum aldosterone and the incidence of hypertension in nonhypertensive persons. *N. Engl. J. Med.* **2004**, *351*, 33-41, doi:10.1056/NEJMoa033263.
43. Wang, N.; Shao, H.; Chen, Y.; Xia, F.; Chi, C.; Li, Q.; Han, B.; Teng, Y.; Lu, Y. Follicle-stimulating hormone, its association with cardiometabolic risk factors, and 10-year risk of cardiovascular disease in postmenopausal women. *J. Am. Heart Assoc.* **2017**, *6*, e005918, doi:10.1161/jaha.117.005918.
44. Masi, C.M.; Hawkey, L.C.; Xu, X.; Veenstra, T.D.; Cacioppo, J.T. Serum estrogen metabolites and systolic blood pressure among middle-aged and older women and men. *Am. J. Hypertens.* **2009**, *22*, 1148-1153, doi:10.1038/ajh.2009.155.
45. Fogari, R.; Preti, P.; Zoppi, A.; Fogari, E.; Rinaldi, A.; Corradi, L.; Mugellini, A. Serum testosterone levels and arterial blood pressure in the elderly. *Hypertens. Res.* **2005**, *28*, 625-630, doi:10.1291/hypres.28.625.
46. Jacobs, D.R., Jr.; Yatsuya, H.; Hearst, M.O.; Thyagarajan, B.; Kalhan, R.; Rosenberg, S.; Smith, L.J.; Barr, R.G.; Duprez, D.A. Rate of decline of forced vital capacity predicts future arterial hypertension: the Coronary Artery Risk Development in Young Adults Study. *Hypertension* **2012**, *59*, 219-225, doi:10.1161/hypertensionaha.111.184101.
47. Engström, G.; Wollmer, P.; Valind, S.; Hedblad, B.; Janzon, L. Blood pressure increase between 55 and 68 years of age is inversely related to lung function: longitudinal results from the cohort study 'Men born in 1914'. *J. Hypertens.* **2001**, *19*, 1203-1208, doi:10.1097/00004872-200107000-00004.
